# Supplementary material
Source: publisher figshare collection journal article supplement (https://acs.figshare.com/ndownloader/files/4694821)
Supplement: Supplementary file 1 [file 4694821]

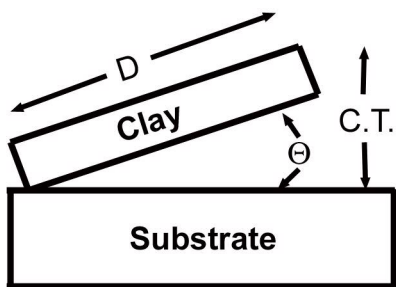

**Supplemental Figure 1.** Given a clay platelet 30 nm in diameter ( $D$ ) and a multilayer cycle thickness ( $C.T.$ ) of 47 Angstroms (4.7 nm), a single clay platelet may tilt by  $\Theta$ ,  $9^\circ$ . This calculation was performed using Pythagorean theorem where 30 nm is considered the hypotenuse of a right triangle.
